# Supplementary material for: Barriers to the Digitization of Health Information: A Qualitative and Quantitative Study in Kenya and Lao PDR Using a Cloud-Based Maternal and Child Registration System
Source: MDPI journal article supplement (doi:10.3390/ijerph18126196), 2021-06-08
Supplement: s1 [file s1]

**Table S1.** Cumulative numbers of mothers and infants, HIV status, and registered numbers of the health facilities in Kenya and Laos PDR.

| Kenya<br>January 28th, 2017 ~ January 31st, 2020 |         |         |         |         | Lao PDR<br>August 3 <sup>rd</sup> , 2017 ~ January 31 <sup>st</sup> , 2020 |         |         |         |          |
|--------------------------------------------------|---------|---------|---------|---------|----------------------------------------------------------------------------|---------|---------|---------|----------|
|                                                  | Mothers |         | Infants |         |                                                                            | Mothers |         | Infants |          |
| Total registered                                 | 12,887  |         | 10,499  |         | Total registered                                                           | 7,132   |         | 3,528   |          |
| Mean age $\pm$ SD <sup>*(1)</sup>                | 26      | $\pm$ 6 | 6       | $\pm$ 9 | Mean age $\pm$ SD <sup>*(1)</sup>                                          | 26      | $\pm$ 5 | 4       | $\pm$ 11 |
|                                                  | N       | %       | N       | %       |                                                                            | N       | %       | N       | %        |
| Number of Mothers under 18y old*                 | 412     | 3.2     | NA      | NA      | Number of Mothers under 18y old*                                           | 593     | 8.31    | NA      | NA       |
| Pregnant women*                                  | 4,382   | 34      | NA      | NA      | Pregnant women*                                                            | 5,867   | 79.6    | NA      | NA       |
| Male population                                  | NA      | NA      | 5,307   | 51.1    | Male population                                                            | NA      | NA      | 1,797   | 51.4     |
| HIV status                                       |         |         |         |         |                                                                            |         |         |         |          |
|                                                  | Mothers |         | Infants |         |                                                                            | Mothers |         | Infants |          |
| HIV test result                                  | N       | %       | N       | %       | HIV test result                                                            | N       | %       | N       | %        |
| reactive                                         | 342     | 2.7     | 29      | 0.3     | reactive                                                                   | 7       | 0.1     | 12      | 0.3      |
| non-reactive                                     | 9,601   | 74.5    | 2,579   | 24.6    | non-reactive                                                               | 3,132   | 43.9    | 1,305   | 37       |
| not-tested                                       | 326     | 2.5     | 5,749   | 54.8    | not-tested                                                                 | 2,704   | 37.9    | 1,962   | 55.6     |
| no response                                      | 2,618   | 20.3    | 2,136   | 20.3    | no response                                                                | 1,289   | 18.1    | 249     | 7.1      |
| Health facilities distribution                   |         |         |         |         |                                                                            |         |         |         |          |
|                                                  | Mothers |         | Infants |         |                                                                            | Mothers |         | Infants |          |
| Name of Health facility                          | N       | %       | N       | %       | Name of Health facility                                                    | N       | %       | N       | %        |
| Kinango Hospital                                 | 3,832   | 29.7    | 3,046   | 29      | Songkhone District Hospital                                                | 3,629   | 50.9    | 1,669   | 47.3     |
| Diani Health Centre                              | 4,234   | 32.8    | 3,630   | 34.6    | Lahanam Health Center                                                      | 551     | 7.7     | 505     | 14.3     |
| Kwale District Hospital                          | 2,368   | 18.4    | 1,856   | 17.7    | Xepon District Hospital                                                    | 2,153   | 30.2    | 926     | 26.3     |
| Mwaluphamba Dispensary                           | 1,092   | 8.5     | 687     | 6.5     | Dongsavanh Health Center                                                   | 550     | 7.7     | 322     | 9.1      |
| Mwachinga Dispensary                             | 718     | 5.6     | 647     | 6.2     | Manchy Health Center                                                       | 249     | 3.5     | 106     | 3        |
| Vyongwani Dispensary                             | 524     | 4.1     | 485     | 4.6     | No Response                                                                | 0       | 0       | 0       | 0        |
| Outreach                                         | 58      | 0.4     | 116     | 1.1     |                                                                            |         |         |         |          |
| No Response                                      | 61      | 0.5     | 26      | 0.3     |                                                                            |         |         |         |          |

<sup>1</sup> \* at the time of registration in WIRE system; (1) Age is expressed in years for mothers and in months for infants

**Table S2.** Cumulative visits of ANC, PNC, and registered services in the WIRE system in Kenya and Lao PDR.

|                             | Kenya |      | Lao PDR |      |                         | Kenya  |      | Lao PDR |      |
|-----------------------------|-------|------|---------|------|-------------------------|--------|------|---------|------|
| ANC visits                  |       |      |         |      | PNC visits              |        |      |         |      |
| Total registered            | 6,875 |      | 12,382  |      | Total registered        | 26,624 |      | 4,355   |      |
| Mean gestation week<br>±SD* | 25    | ± 6  | 21      | ± 7  | Mean infant age<br>±SD* | 9      | ± 11 | 3       | ± 6  |
|                             | N     | %    | N       | %    |                         | N      | %    | N       | %    |
| First ANC visit             | 2,843 | 41.4 | 4,257   | 34.4 | First PNC visits        | 10,041 | 37.7 | 2,549   | 68.5 |
| Two ANC visit               | 1,707 | 24.8 | 2,523   | 20.4 | PNC revisits            | 16,583 | 62.3 | 1,806   | 41.5 |
| Three ANC visit             | 1,154 | 16.8 | 1,931   | 15.6 |                         |        |      |         |      |
| Four ANC visits or more     | 1,171 | 17   | 3,671   | 29.6 |                         |        |      |         |      |
| ANC services                |       |      |         |      | PNC services            |        |      |         |      |
| ANC service type            | N     |      | N       |      | PNC service type        | N      |      | N       |      |
| Breast examination          | 1,299 |      |         |      | BCG vaccine (6)         | 2,958  |      | 1,314   |      |
| Deworming treatment         | 1,709 |      |         |      | IPV (7)                 | 1,436  |      | 366     |      |
| Feeding counselling         | 1,411 |      |         |      | Measles (HIV related)   | 2,094  |      | 417     |      |
| ITN (1)                     | 1,225 |      | 129     |      | OPV (8)                 | 8,998  |      | 1,560   |      |
| Iron and Folate             | 5,855 |      | 7,244   |      | Rota virus vaccine      | 4,198  |      |         |      |
| IPT (2)                     | 5,968 |      |         |      | Pneumococcal vaccine    | 6,248  |      | 1,165   |      |
| TT (3)                      | 1,644 |      |         |      | Yellow fever vaccine    | 5      |      |         |      |
| Vitamin A (4)               | 10    |      |         |      | Deworming treatment (9) | 1,314  |      | 458     |      |
| DT (5)                      |       |      | 3,258   |      | Vitamin A               | 2,621  |      | 918     |      |
| HIV counseling              |       |      | 1,936   |      | ITN                     | 1,887  |      | 4       |      |
| HIV testing                 |       |      | 1,934   |      | Weight monitoring       | 26,487 |      | 4,355   |      |
|                             |       |      |         |      | Height monitoring       | 23,354 |      | 4,327   |      |
|                             |       |      |         |      | Hepatitis B vaccine     |        |      | 2,892   |      |
|                             |       |      |         |      | Penta vaccine           |        |      | 1,658   |      |
|                             |       |      |         |      | JEV (10)                |        |      | 241     |      |

\* age in weeks at the time of first registered visit in WIRE system, (1) Insecticide-Treated Nets, (2) Malaria prophylaxis, (3) Tetanus Toxoid, (4) 200,000 IU, (5) Diphtheria-Tetanus Toxoid, (6) Bacillus Calmette–Guerin vaccine, (7) Inactivated Polio Vaccine, (8) Oral Polio Vaccine, (9) (Albendazole 200mg/400mg), (10) Japanese Encephalitis Vaccine
